# Supplementary material
Source: publisher site journal article supplement (https://www.dovepress.com/article/480457)
Supplement: Supplementary file 1 [file get_supplementary_file.php]

**Supplementary figures**


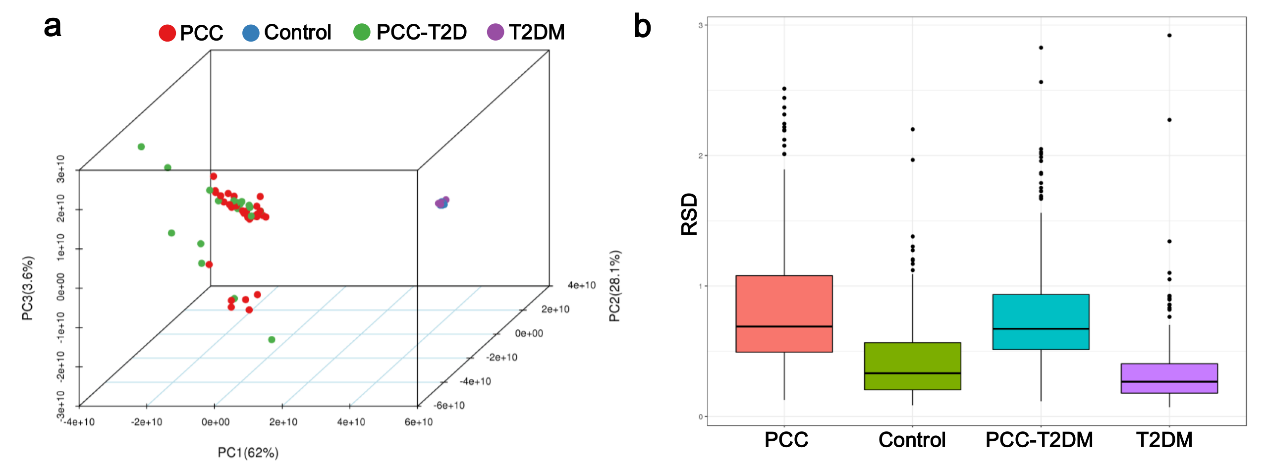


**Figure. S1 Comprehensive UPLC-MS/MS data analysis.**

**a** PCA analysis of samples in the PCC, control, PCC-T2DM, and T2DM groups is depicted using a 3D model. **b** RSD distribution of the samples.


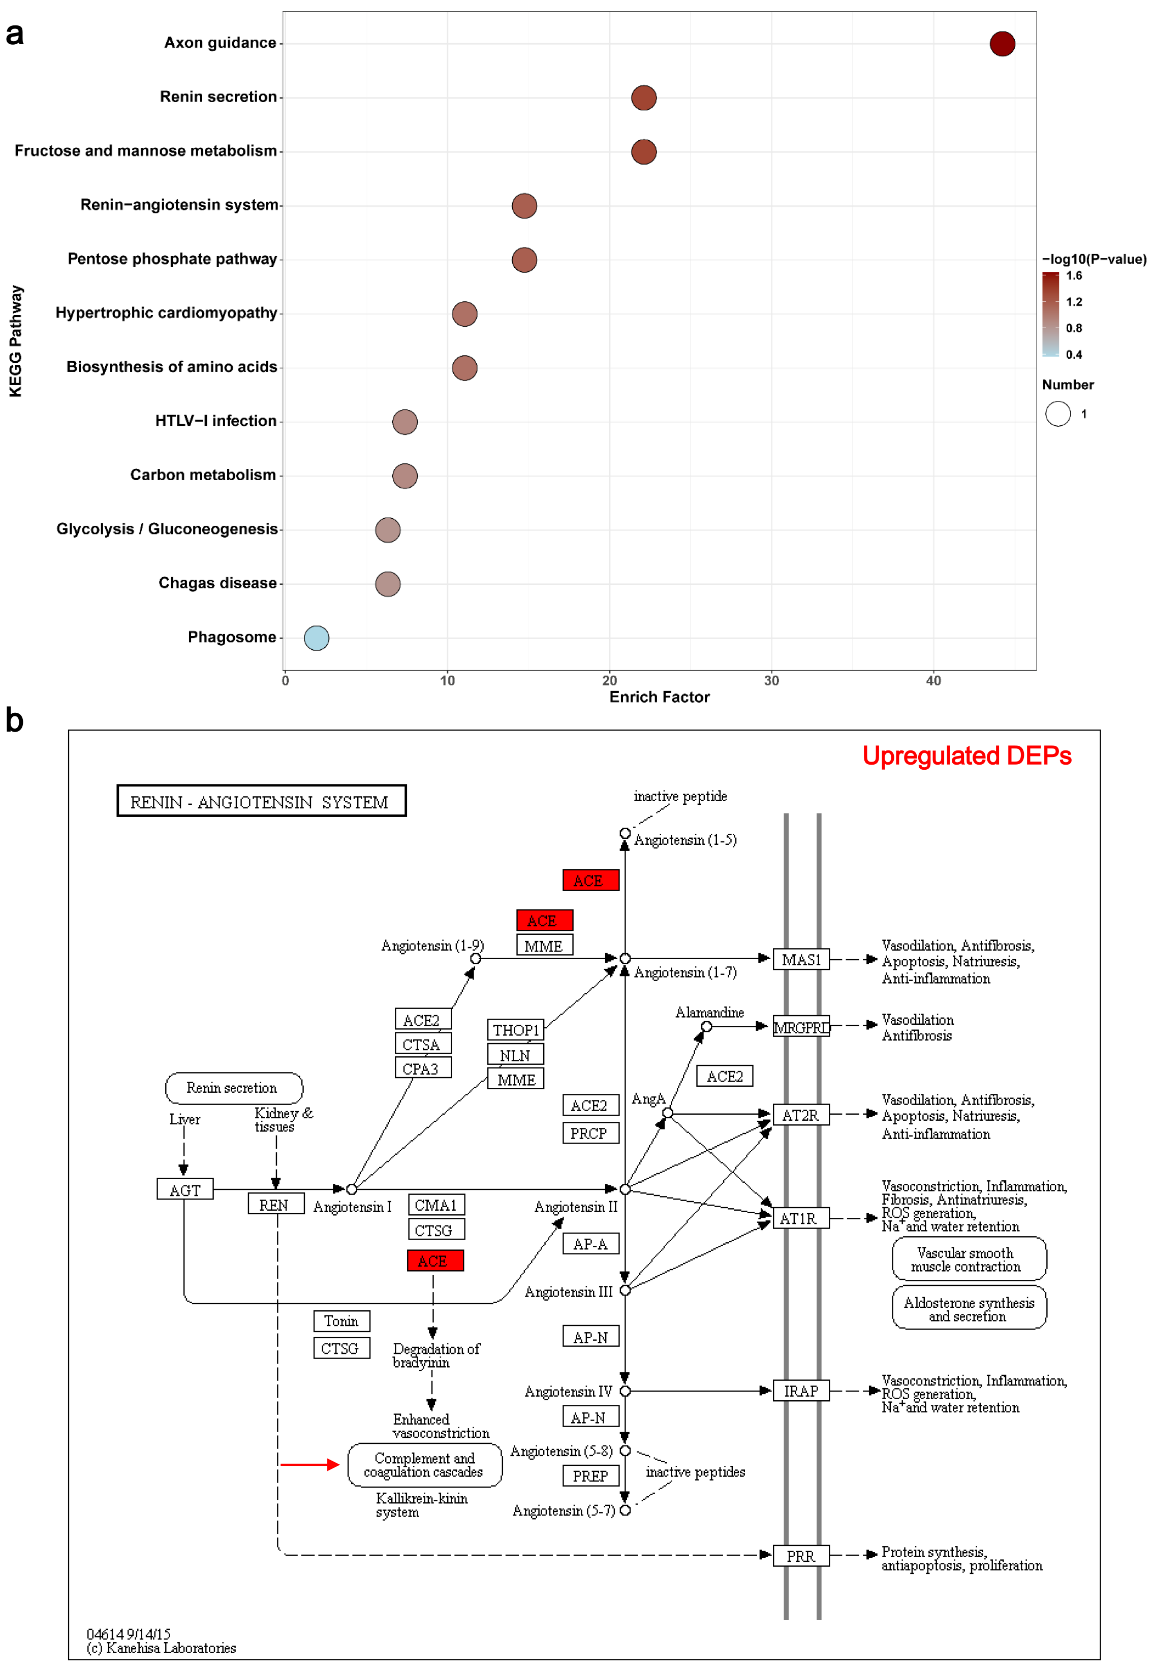


**Figure. S2 Enrichment and interaction analyses of DAPs between the PCC-T2DM and PCC groups.**

**a** Bubble diagram showing KEGG enrichment pathways of DAPs between the PCC-T2DM and PCC groups. **b** KEGG pathway map of renin-angiotensin system (ko04614). The red boxes represent upregulated DAPs in the PCC-T2DM group compared with those in the PCC group.

**Supplementary tables**

**Table S1 Characteristics of patients**

| Group | Number | Gender | Age (year) | BMI (kg/m2) |
| --- | --- | --- | --- | --- |
| Control | Control-1 | female | 43 | 23.6 |
| Control-2 | male | 54 | 24.1 |
| Control-3 | male | 38 | 20.2 |
| Control-4 | female | 43 | 25.6 |
| Control-5 | female | 49 | 25.2 |
| Control-6 | male | 46 | 25.2 |
| Control-7 | female | 36 | 22.7 |
| Control-8 | male | 53 | 26.7 |
| Control-9 | male | 29 | 22.4 |
| Control-10 | male | 46 | 26.6 |
| T2DM | T2DM-1 | male | 48 | 26.8 |
| T2DM-2 | female | 47 | 19.0 |
| T2DM-3 | male | 37 | 27.3 |
| T2DM-4 | male | 57 | 26.2 |
| T2DM-5 | female | 50 | 19.1 |
| T2DM-6 | female | 42 | 22.5 |
| T2DM-7 | male | 44 | 25.9 |
| T2DM-8 | female | 45 | 20.2 |
| T2DM-9 | female | 56 | 25.8 |
| T2DM-10 | female | 44 | 22.2 |
| PCC | PCC-1 | male | 60 | 23.7 |
| PCC-2 | female | 53 | 21.5 |
| PCC-3 | male | 51 | 24.2 |
| PCC-4 | male | 45 | 28.1 |
| PCC-5 | female | 49 | 31.2 |
| PCC-6 | female | 45 | 31.2 |
| PCC-7 | female | 54 | 23.4 |
| PCC-8 | female | 65 | 25.4 |
| PCC-9 | female | 31 | 22.0 |
| PCC-10 | female | 30 | 27.7 |
| PCC-11 | male | 47 | 30.7 |
| PCC-12 | female | 39 | 22.4 |
| PCC-13 | female | 14 | 22.0 |
| PCC-14 | female | 17 | 26.6 |
| PCC-15 | female | 40 | 23.9 |
| PCC-16 | male | 35 | 19.7 |
| PCC-17 | female | 55 | 27.0 |
| PCC-18 | male | 76 | 31.2 |
| PCC-19 | female | 34 | 26.7 |
| PCC-T2DM | PCC-T2DM-1 | male | 59 | 24.7 |
| PCC-T2DM-2 | male | 67 | 29.1 |
| PCC-T2DM-3 | male | 64 | 27.3 |
| PCC-T2DM-4 | male | 50 | 22.5 |
| PCC-T2DM-5 | male | 28 | 19.5 |
| PCC-T2DM-6 | female | 55 | 25.8 |
| PCC-T2DM-7 | male | 51 | 28.7 |
| PCC-T2DM-8 | male | 50 | 26.1 |
| PCC-T2DM-9 | female | 70 | 22.0 |
| PCC-T2DM-10 | male | 42 | 24.0 |
| PCC-T2DM-11 | female | 57 | 23.0 |
| PCC-T2DM-12 | female | 36 | 24.3 |
| PCC-T2DM-13 | female | 61 | 23.0 |
| PCC-T2DM-14 | female | 59 | 25.4 |
| PCC-T2DM-15 | male | 29 | 24.5 |
| PCC-T2DM-16 | female | 33 | 14.3 |
| PCC-T2DM-17 | male | 72 | 23.3 |
| PCC-T2DM-18 | female | 60 | 34.5 |
| PCC-T2DM-19 | female | 72 | 27.6 |
| PCC-T2DM-20 | female | 63 | 25.8 |
| PCC-T2DM-21 | female | 85 | 22.1 |
| PCC-T2DM-22 | female | 51 | 25.2 |
| PCC-T2DM-23 | male | 56 | 29.7 |
| PCC-T2DM-24 | male | 71 | 31.1 |
| PCC-T2DM-25 | male | 70 | 25.9 |
| PCC-T2DM-26 | female | 50 | / |
| PCC-T2DM-27 | female | 62 | 24.8 |
| PCC-T2DM-28 | female | 47 | 32.0 |
| PCC-T2DM-29 | male | 76 | 25.5 |
| PCC-T2DM-30 | male | 46 | 27.0 |
| PCC-T2DM-31 | male | 16 | 25.5 |

**Table S2 Indicators of blood biochemical test**

|  | FBG (mmol/L) | HbA1c (%) | ALT (U/L) | AST (U/L) | TP (g/l) | ALB (g/l) | TG (mmol/L) | TC (mmol/L) | LDL (mmol/L) | Cr (mmol/L) |
| --- | --- | --- | --- | --- | --- | --- | --- | --- | --- | --- |
| PCC (n=19) | 4.95±0.60 | 5.48±0.33 | 19.45±10.98 | 19.71±5.59 | 67.45±4.97 | 40.8±1.9 | 1.38±0.66 | 4.26±1.06 | 2.12±0.64 | 64±13.01 |
| PCC-T2D (n=31) | 7.59±3.18 | 8.26±2.33 | 25.81±19 | 22.03±9.47 | 66.68±7.73 | 40.14±5.43 | 2.13±1.81 | 4.48±1.24 | 2.34±0.77 | 66.18±14.74 |
| T | -3.562 | -5.147 | -1.325 | -0.969 | 0.386 | 0.512 | -1.723 | -0.638 | -1.021 | -0.531 |
| *P* | 0.001** | 0*** | 0.191 | 0.337 | 0.701 | 0.611 | 0.091 | 0.527 | 0.313 | 0.598 |

FBG: fasting blood glucose; HaA1c: glycosylated hemoglobin; ALT: alanine aminotransferase; AST: aspartate aminotransferase; TP: total protein; ALB: albumin; TG: triglycerides; TC: total cholesterol; LDL: low-density lipoprotein; Cr: creatinine. Data are expressed as mean ± SD. ***P* < 0.01, ****P* < 0.001.
